# Supplementary material for: Unveiling the Spatial-Temporal Characteristics and Driving Factors of Greenhouse Gases and Atmospheric Pollutants Emissions of Energy Consumption in Shandong Province, China
Source: MDPI journal article supplement (doi:10.3390/su16031304), 2024-02-03
Supplement: s1 [file s1]

## Table List

**Table S1.** Emission source categorization used in this study

**Table S2.** Emission factors of stationary combustion source

**Table S3.** Emission factors of biomass burning source

**Table S4.** Emission factors of on-road source

**Table S5.** Emission factors of non-road mobile source

**Table S6.** Spatial allocation profile for difference source

**Table S7.** Temporal allocation profile for difference source

**Table S8.** Uncertainty of the emission inventory

**Table S9.** Results of multicollinearity test for factors influencing GHG and air pollutant emissions in Shandong Province, 2010-2021.

**Table S10.** Ridge regression coefficients and variance test results of the factors influencing GHGs when  $k=0.62$

**Table S11.** Ridge regression coefficients and variance test results of the factors influencing air pollutants when  $k=0.3$

**Table S12.** Scenario setting of annual change rate of carbon emission drivers in Shandong Province.

## Figure List

**Figure S1.** Hourly variation profiles for on-road mobile sources. Note: Data are weekend and weekday averages for 2021.

**Figure S2.** The probability of emission amount and cumulative probability in 2021 over all grids (at 5 km by 5 km) for each species, including GHGs, SO<sub>2</sub>, NO<sub>x</sub>, CO, PM<sub>10</sub>, PM<sub>2.5</sub>, VOCs, and NH<sub>3</sub>. Shown are the probability of emissions (left Y axis), the corresponding sample size (right Y1 axis), and cumulative probability (right Y2 axis) for each bin of emission amount (X axis).

**Figure S3.** Simulation values and errors of GHGs and air pollutants

**Figure S4.** Relationship between the GHG ridge regression coefficient and K value and scatter diagram of determinable coefficient  $R^2$  and K value

**Figure S5.** Relationship between the air pollutant ridge regression coefficient and K value and scatter diagram of determinable coefficient  $R^2$  and K value

**Table S1.** Emission source categorization used in this study.

| Category                            | Sector                   | Activity level data                                                               |
|-------------------------------------|--------------------------|-----------------------------------------------------------------------------------|
| <b>Stationary combustion source</b> | Power plant              | Coal, diesel oil, fuel oil, natural gas dieses, liquefied petroleum gas           |
|                                     | Heating supply           | Coal, diesel oil, fuel oil, natural gas dieses, liquefied petroleum gas           |
|                                     | Industrial combustion    | Coal, diesel oil, fuel oil, natural gas dieses, kerosene, liquefied petroleum gas |
|                                     | Commercial combustion    | Coal                                                                              |
| <b>Biomass burning</b>              | Residential combustion   | Raw coal, cleaned coal, other coal washing, coal briquette                        |
|                                     | Interior straw burning   | Wheat, rice, corn, soybean, cotton, peanut                                        |
|                                     | Open straw burning       | Wheat, rice, corn, soybean, cotton, peanut                                        |
| <b>Road mobile source</b>           | Heavy truck              | Diesel Oil, gasoline                                                              |
|                                     | Light passenger Vehicles | Gasoline                                                                          |
|                                     | Light truck              | Diesel Oi, gasoline                                                               |
|                                     | Heavy passenger Vehicles | Diesel Oi, gasoline                                                               |
|                                     | Motorbike                | Gasoline                                                                          |
| <b>Non-road mobile source</b>       | Airport                  | Take-off cycles                                                                   |
|                                     | Railway                  | Freight turnover                                                                  |
|                                     | Waterway                 | Freight turnover                                                                  |
|                                     | Farm machinery           | Agricultural machinery, fuel consumption                                          |
|                                     | Agricultural vehicle     | Fuel consumption                                                                  |
|                                     | Building machinery       | Fuel consumption                                                                  |

**Table S2.** Emission factors of stationary combustion source.

| Source                 | Fuel type               | Emission factors (kg/t-fuel) |                    |                     |                    |                     |                      |                   |
|------------------------|-------------------------|------------------------------|--------------------|---------------------|--------------------|---------------------|----------------------|-------------------|
|                        |                         | SO <sub>2</sub>              | NO <sub>x</sub>    | PM <sub>10</sub>    | PM <sub>2.5</sub>  | CO                  | VOCs                 | NH <sub>3</sub>   |
| Power plant            | Coal                    | 9.6 <sup>a</sup>             | 9.95 <sup>a</sup>  | 114.04 <sup>e</sup> | 29.43 <sup>f</sup> | 2.48 <sup>b</sup>   | 0.15 <sup>b</sup>    | 0.02 <sup>b</sup> |
|                        | Diesel oil              | 11.2 <sup>a</sup>            | 7.4 <sup>a</sup>   | 0.5 <sup>e</sup>    | 0.5 <sup>f</sup>   | 0.6 <sup>a</sup>    | 0.12 <sup>g</sup>    |                   |
|                        | Fuel oil                | 11.2 <sup>a</sup>            | 10.06 <sup>a</sup> | 0.85 <sup>e</sup>   | 0.62 <sup>f</sup>  | 0.6 <sup>a</sup>    | 0.13 <sup>g</sup>    |                   |
|                        | Natural gas             | 0.34 <sup>b</sup>            | 4.096 <sup>a</sup> | 0.03 <sup>e</sup>   | 0.03 <sup>f</sup>  | 1.3 <sup>a</sup>    | 0.045 <sup>g</sup>   |                   |
|                        | Liquefied petroleum gas |                              | 3.74 <sup>a</sup>  | 0.03 <sup>e</sup>   | 0.03 <sup>f</sup>  | 0.36 <sup>a</sup>   | 0.034 <sup>g</sup>   |                   |
| Heating supply         | Coal                    | 9.6 <sup>a</sup>             | 3.75 <sup>a</sup>  | 114.04 <sup>e</sup> | 29.43 <sup>f</sup> | 15 <sup>a</sup>     | 0.18 <sup>g</sup>    | 0.05 <sup>b</sup> |
|                        | Diesel oil              |                              | 5.77 <sup>a</sup>  | 0.5 <sup>e</sup>    | 0.5 <sup>f</sup>   | 0.6 <sup>a</sup>    | 0.12 <sup>g</sup>    | 0.11 <sup>b</sup> |
|                        | Fuel oil                |                              | 3.5 <sup>a</sup>   | 0.85 <sup>e</sup>   | 0.62 <sup>f</sup>  | 0.6 <sup>a</sup>    | 0.2 <sup>g</sup>     | 0.04 <sup>b</sup> |
|                        | Natural gas             | 0.18 <sup>a</sup>            | 1.462 <sup>a</sup> | 0.03 <sup>e</sup>   | 0.03 <sup>f</sup>  | 1.3 <sup>a</sup>    | 0.088 <sup>g</sup>   |                   |
|                        | Liquefied petroleum gas |                              | 1.58 <sup>a</sup>  | 0.03 <sup>e</sup>   | 0.03 <sup>f</sup>  | 0.36 <sup>a</sup>   | 0.5 <sup>g</sup>     |                   |
| Industrial combustion  | Coal                    | 9.6 <sup>a</sup>             | 4.29 <sup>c</sup>  | 53.4 <sup>e</sup>   | 18.69 <sup>f</sup> | 15 <sup>c</sup>     | 0.39 <sup>g</sup>    | 0.05 <sup>b</sup> |
|                        | Diesel oil              | 2.24 <sup>a</sup>            | 9.62 <sup>b</sup>  | 0.5 <sup>b</sup>    | 0.5 <sup>b</sup>   | 0.6 <sup>b</sup>    | 0.13 <sup>g</sup>    | 0.11 <sup>b</sup> |
|                        | Fuel oil                | 2.24 <sup>a</sup>            | 5.84 <sup>b</sup>  | 0.85 <sup>b</sup>   | 0.67 <sup>b</sup>  | 0.6 <sup>b</sup>    | 0.35 <sup>g</sup>    | 0.04 <sup>b</sup> |
|                        | Kerosene                | 2.24 <sup>a</sup>            | 7.46 <sup>a</sup>  | 0.9 <sup>e</sup>    | 0.9 <sup>f</sup>   | 0.6 <sup>a</sup>    | 0.093 <sup>g</sup>   |                   |
|                        | Natural gas             | 0.18 <sup>a</sup>            | 2.085 <sup>a</sup> | 0.03 <sup>e</sup>   | 0.03 <sup>f</sup>  | 1.3 <sup>a</sup>    | 0.088 <sup>g</sup>   |                   |
|                        | Liquefied petroleum gas | 0.486 <sup>a</sup>           | 7.10 <sup>a</sup>  | 0.03 <sup>e</sup>   | 0.03 <sup>f</sup>  | 0.972 <sup>a</sup>  | 0.48 <sup>g</sup>    |                   |
|                        | Coal gas                | 0.08 <sup>a</sup>            | 0.8 <sup>a</sup>   | 0.03 <sup>e</sup>   | 0.03 <sup>f</sup>  | 1.3 <sup>a</sup>    | 0.00044 <sup>g</sup> |                   |
| Commercial combustion  | Coal                    | 9.6 <sup>a</sup>             | 3.75 <sup>a</sup>  | 53.4 <sup>e</sup>   | 18.69 <sup>f</sup> | 15 <sup>a</sup>     | 0.45 <sup>g</sup>    | 0.6               |
| Residential combustion | Raw coal                | 9.6 <sup>a</sup>             | 1.35 <sup>a</sup>  | 9.52 <sup>e</sup>   | 7.35 <sup>f</sup>  | 105 <sup>a</sup>    | 0.6 <sup>d</sup>     | 0.9 <sup>c</sup>  |
|                        | Cleaned coal            | 9.6 <sup>a</sup>             | 0.9 <sup>a</sup>   | 3.71 <sup>e</sup>   | 2.97 <sup>f</sup>  | 72.8 <sup>a</sup>   | 0.6 <sup>d</sup>     | 0.32 <sup>c</sup> |
|                        | Other coal washing      | 9.6 <sup>a</sup>             | 0.9 <sup>a</sup>   | 3.71 <sup>e</sup>   | 2.97 <sup>f</sup>  | 72.8 <sup>a</sup>   | 0.6 <sup>d</sup>     |                   |
|                        | Coal briquette          | 9.6 <sup>a</sup>             | 0.8 <sup>a</sup>   | 3.71 <sup>e</sup>   | 2.97 <sup>f</sup>  | 72.8 <sup>a</sup>   | 0.6 <sup>d</sup>     |                   |
|                        | Diesel oil              |                              | 3.21 <sup>a</sup>  | 0.5 <sup>e</sup>    | 0.5 <sup>f</sup>   | 0.6 <sup>a</sup>    | 0.143 <sup>d</sup>   |                   |
|                        | Fuel oil                |                              | 1.95 <sup>a</sup>  | 0.85 <sup>e</sup>   | 0.28 <sup>f</sup>  | 0.6 <sup>a</sup>    | 0.35 <sup>d</sup>    |                   |
|                        | Kerosene                |                              | 2.49 <sup>a</sup>  | 0.9 <sup>e</sup>    | 0.9 <sup>f</sup>   | 0.6 <sup>a</sup>    | 0.15 <sup>d</sup>    |                   |
|                        | Natural gas             | 0.27 <sup>a</sup>            | 1.462 <sup>a</sup> | 0.03 <sup>e</sup>   | 0.03 <sup>f</sup>  | 1.3 <sup>a</sup>    | 0.13 <sup>d</sup>    | 0.32 <sup>h</sup> |
|                        | Liquefied petroleum gas | 0.12 <sup>a</sup>            | 4.141 <sup>a</sup> | 0.17 <sup>e</sup>   | 0.17 <sup>f</sup>  | 0.7272 <sup>a</sup> | 0.36 <sup>d</sup>    |                   |
|                        | Coal gas                | 0.16 <sup>a</sup>            | 0.736 <sup>a</sup> | 0.03 <sup>e</sup>   | 0.03 <sup>f</sup>  | 1.3 <sup>a</sup>    | 0.00044 <sup>d</sup> |                   |

a. Jiang et al. (2020)

b. Liu et al. (2018)

c. Bai et al. (2020)

d. Technical guide for the compilation of the emission inventory of atmospheric volatile organic compounds

e. Technical Guidelines for the Compilation of Emission Inventories of Atmospheric Inhalable Particulate Matter from Primary Sources

f. Technical Guidelines for the Compilation of Emission Inventories of Atmospheric Fine Particulate Matter from Primary Sources

g. Technical Guidelines for the Compilation of Emission Inventories of Atmospheric Volatile Organic Compounds and Matter Sources

h. Qiu et al. (2014)

**Table S3.** Emission factors of biomass burning source.

| Source type            |          | Emission factor (kg/t) |                   |                     |                    |                   |                   |                   |
|------------------------|----------|------------------------|-------------------|---------------------|--------------------|-------------------|-------------------|-------------------|
|                        |          | SO <sub>2</sub>        | NO <sub>x</sub>   | CO                  | PM <sub>10</sub>   | PM <sub>2.5</sub> | VOCs              | NH <sub>3</sub>   |
| Open straw burning     | Wheat    | 0.74 <sup>a</sup>      | 2.89 <sup>a</sup> | 60 <sup>b</sup>     | 7.73 <sup>a</sup>  | 7.13 <sup>a</sup> | 7.49 <sup>a</sup> | 0.37 <sup>b</sup> |
|                        | Rice     | 0.64 <sup>d</sup>      | 2.62 <sup>d</sup> | 53.2 <sup>b</sup>   | 9.89 <sup>d</sup>  | 9.39 <sup>d</sup> | 7.25 <sup>a</sup> | 0.53 <sup>b</sup> |
|                        | Corn     | 0.45 <sup>d</sup>      | 3.43 <sup>a</sup> | 53 <sup>b</sup>     | 11.95 <sup>a</sup> | 11.3 <sup>a</sup> | 10.2 <sup>a</sup> | 0.68 <sup>b</sup> |
|                        | Soyabean | 0.48 <sup>b</sup>      | 1.08 <sup>a</sup> | 32.3 <sup>b</sup>   | 9.54 <sup>a</sup>  | 7.58 <sup>a</sup> | 8.64 <sup>a</sup> | 0.53 <sup>b</sup> |
|                        | Cotton   | 0.56 <sup>a</sup>      | 2.68 <sup>a</sup> | 67.4 <sup>b</sup>   | 9.54 <sup>a</sup>  | 7.58 <sup>a</sup> | 8.17 <sup>a</sup> | 0.53 <sup>b</sup> |
|                        | Peanut   | 0.48 <sup>b</sup>      | 5.3 <sup>b</sup>  | 102 <sup>b</sup>    | 6.93 <sup>c</sup>  | 6.3 <sup>b</sup>  | 9.42 <sup>b</sup> | 0.53 <sup>b</sup> |
| Interior straw burning | Wheat    | 1.2 <sup>c</sup>       | 1.19 <sup>c</sup> | 139.46 <sup>c</sup> | 8.86 <sup>c</sup>  | 8.24 <sup>c</sup> | 9.37 <sup>c</sup> | 0.37 <sup>c</sup> |
|                        | Rice     | 0.48 <sup>c</sup>      | 1.92 <sup>c</sup> | 79.7 <sup>c</sup>   | 6.88 <sup>a</sup>  | 6.4 <sup>a</sup>  | 8.4 <sup>c</sup>  | 0.52 <sup>c</sup> |
|                        | Corn     | 1.33 <sup>c</sup>      | 1.86 <sup>c</sup> | 82.37 <sup>c</sup>  | 7.39 <sup>a</sup>  | 6.87 <sup>c</sup> | 7.34 <sup>c</sup> | 0.68 <sup>c</sup> |
|                        | Soyabean | 0.53 <sup>c</sup>      | 1.12 <sup>c</sup> | 80.7 <sup>c</sup>   | 7.69 <sup>c</sup>  | 7.15 <sup>c</sup> | 8.82 <sup>c</sup> | 1.3 <sup>c</sup>  |
|                        | Cotton   | 0.53 <sup>c</sup>      | 2.49 <sup>c</sup> | 121.7 <sup>c</sup>  | 7.69 <sup>c</sup>  | 7.15 <sup>c</sup> | 8.82 <sup>c</sup> | 1.3 <sup>c</sup>  |
|                        | Peanut   | 0.53 <sup>c</sup>      | 2.49 <sup>c</sup> | 121.7 <sup>c</sup>  | 7.69 <sup>c</sup>  | 7.15 <sup>c</sup> | 8.82 <sup>c</sup> | 1.3 <sup>c</sup>  |

a. Zhou et al. (2021)

b. Gao et al. (2017)

c. Zhou et al. (2017)

d. Zhang et al. (2017a)

**Table S4.** Emission factors of road mobile source.

| Source                   | Emission factors (g/km) |                  |                  |                  |                    |                  |
|--------------------------|-------------------------|------------------|------------------|------------------|--------------------|------------------|
|                          | SO <sub>2</sub>         | NO <sub>x</sub>  | CO               | PM <sub>10</sub> | PM <sub>2.5</sub>  | VOCs             |
| Heavy truck              | 0.067 <sup>a</sup>      | 10 <sup>b</sup>  | 2.8 <sup>b</sup> | 0.3 <sup>b</sup> | 0.381 <sup>a</sup> | 0.5 <sup>b</sup> |
| Light passenger Vehicles | 0.051 <sup>a</sup>      | 0.2 <sup>b</sup> | 3.2 <sup>b</sup> | 0.1 <sup>b</sup> | 0.026 <sup>a</sup> | 0.5 <sup>b</sup> |
| Light truck              | 0.056 <sup>a</sup>      | 6 <sup>b</sup>   | 2.3 <sup>b</sup> | 0.3 <sup>b</sup> | 0.282 <sup>a</sup> | 0.7 <sup>b</sup> |
| Heavy passenger Vehicles | 0.054 <sup>a</sup>      | 0.1 <sup>b</sup> | 9 <sup>b</sup>   | 0.1 <sup>b</sup> | 0.007 <sup>a</sup> | 0.1 <sup>b</sup> |
| Motorbike                | 0.027 <sup>a</sup>      | 0.2 <sup>b</sup> | 3.2 <sup>b</sup> | 0.1 <sup>b</sup> | 0.36 <sup>a</sup>  | 1.1 <sup>b</sup> |

a. Technical Guidelines for Compiling Atmospheric Pollutant Emission Inventory of Road Vehicles

b. Sun et al. (2016)

**Table S5.** Emission factors of non-road mobile source.

| Source                 | Emission factors (kg/t) |                    |                    |                   |                   |                    |
|------------------------|-------------------------|--------------------|--------------------|-------------------|-------------------|--------------------|
|                        | SO <sub>2</sub>         | NO <sub>x</sub>    | PM <sub>10</sub>   | PM <sub>2.5</sub> | CO                | VOCs               |
| Airport                | 1 <sup>a</sup>          | 28.63 <sup>a</sup> | 14.56 <sup>a</sup> | 0.53 <sup>a</sup> | 0.23 <sup>a</sup> | 0.1 <sup>a</sup>   |
| Ship                   | 30 <sup>e</sup>         | 55 <sup>e</sup>    | 1.1 <sup>f</sup>   | 0.98 <sup>f</sup> | 8.94 <sup>e</sup> | 4.76 <sup>e</sup>  |
| Railroad               | 10 <sup>e</sup>         | 54.1 <sup>b</sup>  | 2.07 <sup>b</sup>  | 1.97 <sup>b</sup> | 8.29 <sup>b</sup> | 6.14 <sup>c</sup>  |
| Agricultural machinery | 13.5 <sup>d</sup>       | 68.16 <sup>d</sup> | 4.2 <sup>d</sup>   | 3.97 <sup>d</sup> | 28.9 <sup>d</sup> | 91.5 <sup>c</sup>  |
| Construction machinery | 126.8 <sup>d</sup>      | 31.09 <sup>d</sup> | 1.44 <sup>d</sup>  | 1.36 <sup>d</sup> | 1.29 <sup>d</sup> | 11.66 <sup>c</sup> |

a. WANG Rui-peng (2020)

b. Zhou et al. (2019)

c. Zhang et al. (2017b)

d. Hua et al. (2019)

e. Zhou et al. (2018)

f. Yi et al. (2021)

**Table S6** Spatial allocation profile and Spatial type for different sources

| Category                      | Subcategory                  | Spatial allocation           | Spatial type   |
|-------------------------------|------------------------------|------------------------------|----------------|
| <b>Stationary combustion</b>  | Power plant                  | Longitude and latitude       | Point source   |
|                               | Heating plant                | Longitude and latitude       | Point source   |
|                               | Industry                     | Spatial distribution of GDP  | Surface source |
|                               | Commerce or Commercial       | Spatial distribution of GDP  | Surface source |
|                               | Resident                     | Population density           | Surface source |
| <b>Biomass combustion</b>     | Outdoor biomass combustion   | Cultivated land distribution | Surface source |
|                               | Indoor combustion            | Rural residential area       | Surface source |
| <b>Road mobile source</b>     | Heavy-duty passenger vehicle | Road network                 | Line source    |
|                               | Light-duty passenger vehicle |                              |                |
|                               | Heavy-duty cargo truck       |                              |                |
|                               | Light-duty cargo truck       |                              |                |
|                               | Motorcycle                   |                              |                |
| <b>Non-road mobile source</b> | Airplane                     | Latitude and longitude       | Point source   |
|                               | Train                        | Railway network              | Line source    |
|                               | Ship                         | Latitude and longitude       | Point source   |
|                               | Agricultural machinery       | Cultivated land distribution | Surface source |
|                               | Construction machinery       | Spatial distribution of GDP  | Surface source |

**Table S7.** Temporal allocation profile for different source

| Category                      | Subcategory                                | Temporal allocation                        | profile reference                                                                       |
|-------------------------------|--------------------------------------------|--------------------------------------------|-----------------------------------------------------------------------------------------|
| <b>Stationary combustion</b>  | Power plant                                | Thermal power generation                   | National Bureau of Statistics of China                                                  |
|                               | Heating plant                              | Heating time                               | Shandong Provincial People's Government                                                 |
|                               | Industry                                   | Industrial Boiler Output                   |                                                                                         |
|                               | Commerce or Commercial                     | Average                                    | National Bureau of Statistics of China                                                  |
|                               | Resident                                   | Natural gas variation                      |                                                                                         |
| <b>Mobile source</b>          | On-road mobile sources                     | Traffic flow                               | Shandong Provincial Department of transportation                                        |
|                               | Diurnal variation of on-road mobile source | Congestion delay index                     | <a href="https://report.amap.com/index.do">https://report.amap.com/index.do</a>         |
| <b>Biomass combustion</b>     | Indoor combustion                          | Average                                    | <a href="http://nync.shandong.gov.cn/">http://nync.shandong.gov.cn/</a>                 |
|                               | Outdoor biomass combustion                 | Monthly fire points                        | <a href="https://firms.modaps.eosdis.nasa.gov">https://firms.modaps.eosdis.nasa.gov</a> |
| <b>Non-road mobile source</b> | Airplane                                   | Airports' passenger flow                   |                                                                                         |
|                               | Train                                      | Railway transport data                     |                                                                                         |
|                               | Ship                                       | Waterways transport data                   | Shandong Provincial Department of transportation                                        |
|                               | Agricultural machinery                     | Agricultural busy production and operation |                                                                                         |
|                               | Construction machinery                     | Average                                    |                                                                                         |



**Table S8.** Uncertainty of the emission inventory

| Type                         | CO <sub>2</sub> | SO <sub>2</sub> | NO <sub>x</sub> | PM <sub>10</sub> | PM <sub>2.5</sub> | CO       | VOCs     | NH <sub>3</sub> |
|------------------------------|-----------------|-----------------|-----------------|------------------|-------------------|----------|----------|-----------------|
| <b>Stationary combustion</b> | -26%-26%        | -15%-13%        | -21%-23%        | -17%-25%         | -17%-25%          | -32%-35  | -43%-55% | -63%-57%        |
| <b>Biomass combustion</b>    | /               | -35%-35%        | -37%-36%        | -42%-42%         | -42%-42%          | -45%-60% | -29%-31% | -74%-73%        |
| <b>Non-road mobile</b>       | -32%-32%        | -32%-32%        | -32%-32%        | -37%-42%         | -37%-42%          | -32%-35% | -44%-54% | /               |
| <b>Road mobile</b>           | -35%-35%        | -7%-8%          | -23%-23%        | -19%-17%         | -19%-17%          | -25%-27% | -33%-50% | /               |
| <b>Total</b>                 | -26%-26%        | -16%-14%        | -23%-23%        | -18%-14%         | -18%-23%          | 33%-38%  | -34%-48% | -65%-61%        |

**Table S9.** Results of multicollinearity test for factors influencing GHG and air pollutant emissions in Shandong Province, 2010-2021.

| Model    | Unstandardized Coefficients |        | Standardized Coefficients | t      | Sig   | Collinearity Statistics |         |
|----------|-----------------------------|--------|---------------------------|--------|-------|-------------------------|---------|
|          | B                           | SE(B)  | Beta                      |        |       | Tolerance               | VIF     |
| Constant | -12.646                     | 26.435 |                           | -0.478 | 0.653 |                         |         |
| lnP1     | 2.322                       | 2.923  | 1.047                     | 0.794  | 0.463 | 0.007                   | 138.055 |
| lnA1     | -0.059                      | 0.623  | -0.255                    | -0.095 | 0.928 | 0.002                   | 572.175 |
| lnA2     | 0.503                       | 0.446  | 1.092                     | 1.128  | 0.311 | 0.013                   | 74.566  |
| lnT1     | 0.413                       | 0.747  | 1.128                     | 0.552  | 0.604 | 0.003                   | 331.720 |
| lnT2     | -0.378                      | 0.446  | -1.210                    | -0.849 | 0.435 | 0.006                   | 161.330 |
| lnT3     | -0.076                      | 0.059  | -1.087                    | -1.286 | 0.255 | 0.018                   | 56.858  |

**Table S10.** Ridge regression coefficients and variance test results of the factors influencing GHGs when  $k=0.62$

|          | B        | SE(B)    | Beta.std | t        | sig      |
|----------|----------|----------|----------|----------|----------|
| lnP1     | 0.346012 | 0.083911 | 0.155996 | 4.123568 | 0.009142 |
| lnA1     | 0.034484 | 0.007074 | 0.148418 | 4.87511  | 0.004572 |
| lnA2     | -0.06179 | 0.019327 | -0.1343  | -3.1973  | 0.024068 |
| lnT1     | 0.050482 | 0.013475 | 0.138036 | 3.746437 | 0.013343 |
| lnT2     | -0.05342 | 0.014996 | -0.17079 | -3.56237 | 0.016174 |
| lnT3     | 0.007744 | 0.002978 | 0.110606 | 2.600611 | 0.048214 |
| Constant | 9.804389 | 0.822163 | 0        | 11.92512 | 0.000073 |

**Table S11.** Ridge regression coefficients and variance test results of the factors influencing air pollutants when  $k=0.3$

|          | B           | SE(B)      | Beta.std    | t           | sig        |
|----------|-------------|------------|-------------|-------------|------------|
| lnP1     | -4.83341835 | 0.72254976 | -0.17746468 | -6.68939168 | 0.00112883 |
| lnA1     | -0.49136298 | 0.07265641 | -0.17222693 | -6.76283061 | 0.00107386 |
| lnA2     | 0.90852181  | 0.18701886 | 0.16081302  | 4.85791546  | 0.0046416  |
| lnT1     | 1.05972771  | 0.40771272 | 0.16153224  | 2.59920199  | 0.04829604 |
| lnT2     | 0.57053609  | 0.14925013 | 0.1485489   | 3.82268392  | 0.01233932 |
| lnT3     | -0.12705376 | 0.03226139 | -0.14778961 | -3.93826104 | 0.010979   |
| Constant | 49.59168683 | 6.71754001 | 0           | 7.38241778  | 0.00071698 |

**Table S12.** Scenario setting of annual change rate of carbon emission drivers in Shandong Province

| Scenarios | Year      | P1      | A1    | A2     | T1     | T2     | T3   |
|-----------|-----------|---------|-------|--------|--------|--------|------|
| L         | 2022-2025 | -0.003  | 0.045 | -0.013 | -0.013 | -0.039 | 0.05 |
|           | 2026-2030 | -0.005  | 0.04  | -0.011 | -0.023 | -0.027 | 0.04 |
|           | 2031-2035 | -0.006  | 0.035 | -0.009 | -0.033 | -0.015 | 0.03 |
| M         | 2022-2025 | -0.002  | 0.055 | -0.011 | -0.008 | -0.034 | 0.06 |
|           | 2026-2030 | -0.003  | 0.05  | -0.009 | -0.018 | -0.022 | 0.05 |
|           | 2031-2035 | -0.004  | 0.04  | -0.007 | -0.028 | -0.001 | 0.04 |
| H         | 2022-2025 | -0.001  | 0.075 | -0.009 | -0.003 | -0.029 | 0.07 |
|           | 2026-2030 | -0.0015 | 0.055 | -0.007 | -0.013 | -0.017 | 0.06 |
|           | 2031-2035 | -0.002  | 0.05  | -0.005 | -0.023 | -0.005 | 0.05 |

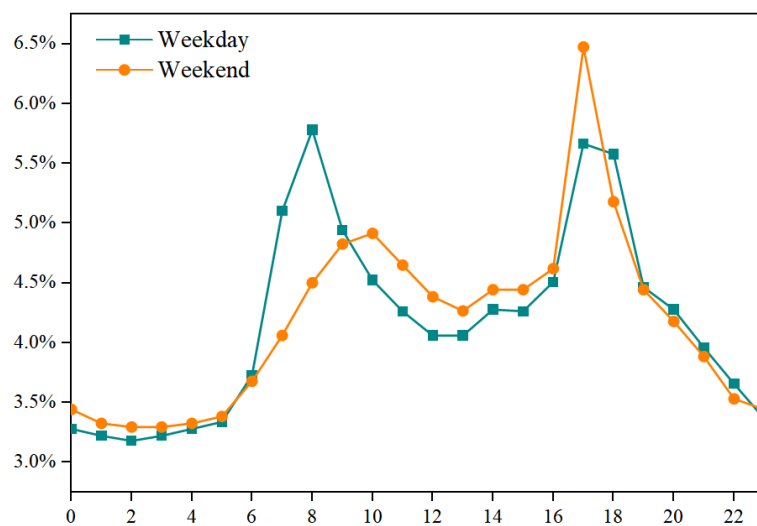

**Figure S1.** Hourly variation profiles for on-road mobile sources. Note: Data are weekend and weekday averages for 2021.

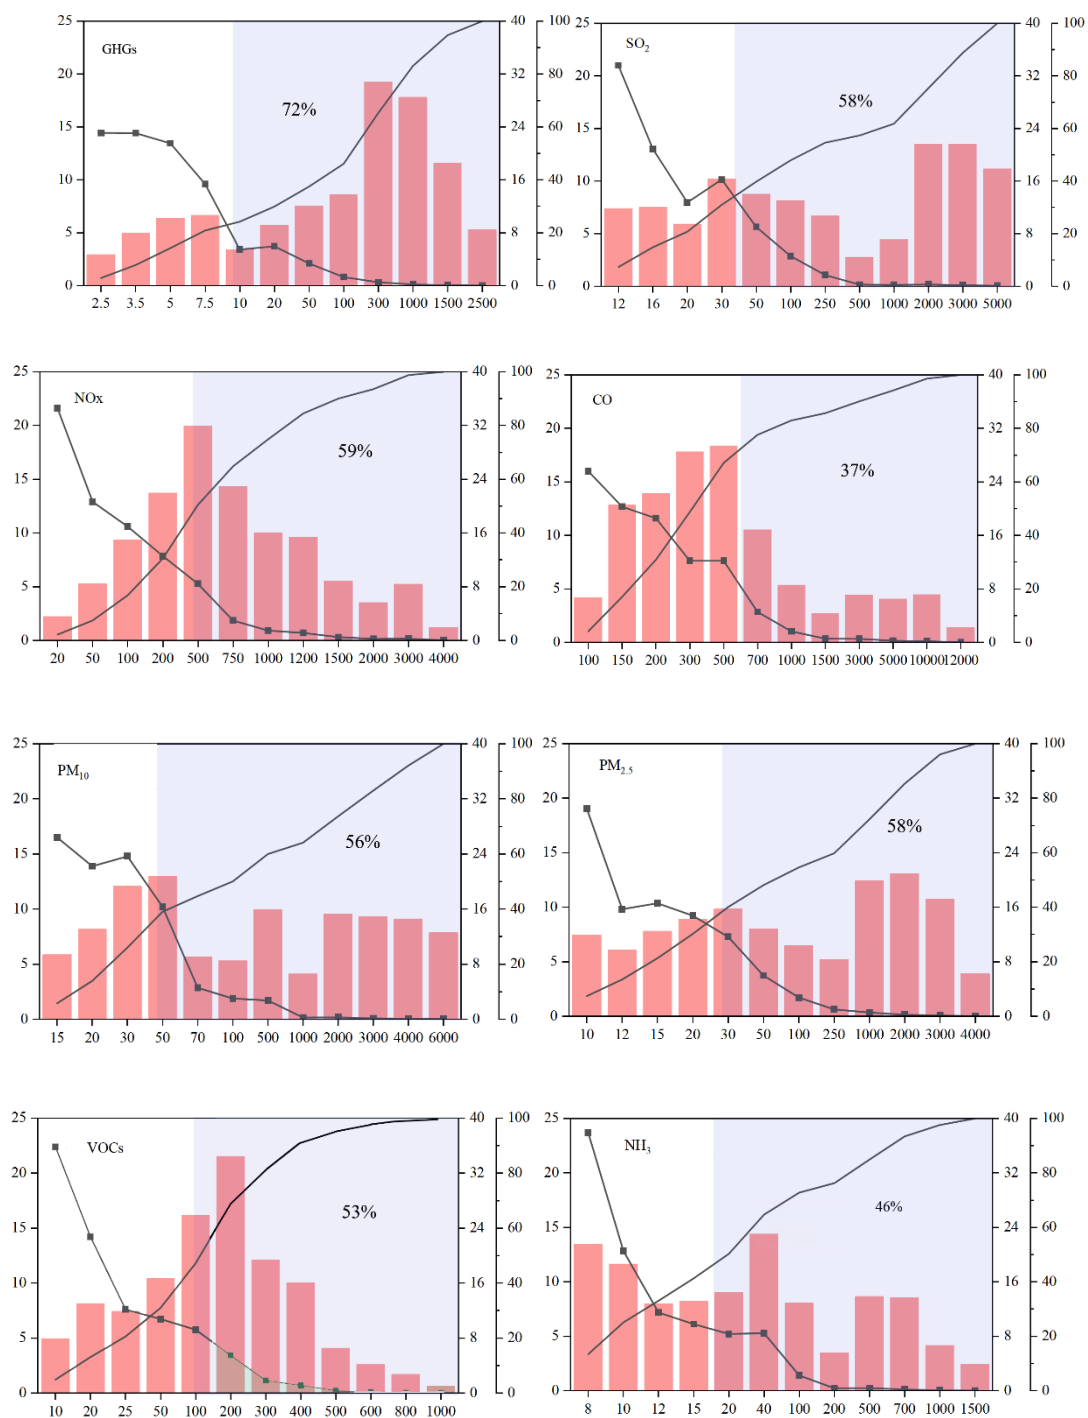

**Figure S2.** The probability of emission amount and cumulative probability in 2021 over all grids (at 5 km by 5 km) for each species, including GHGs, SO<sub>2</sub>, NO<sub>x</sub>, CO, PM<sub>10</sub>, PM<sub>2.5</sub>, VOCs, and NH<sub>3</sub>. Shown are the probability of emissions (left Y axis), the corresponding sample size (right Y1 axis), and cumulative probability (right Y2 axis) for each bin of emission amount (X axis).

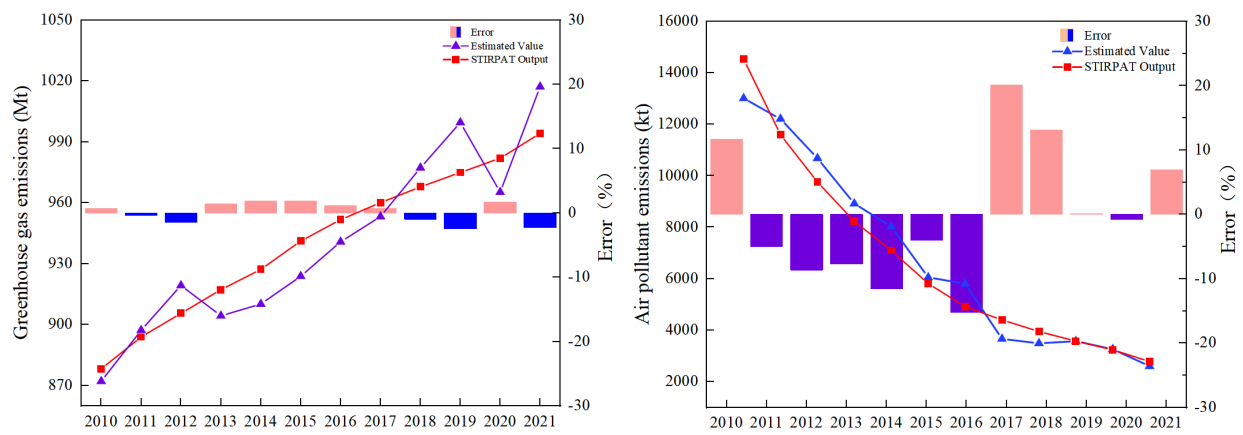

**Figure S3.** Simulation values and errors of GHGs and air pollutants

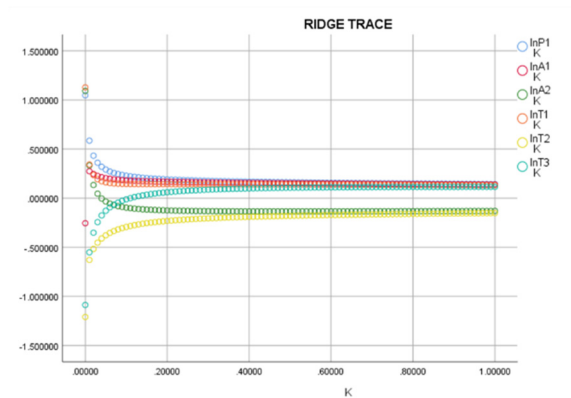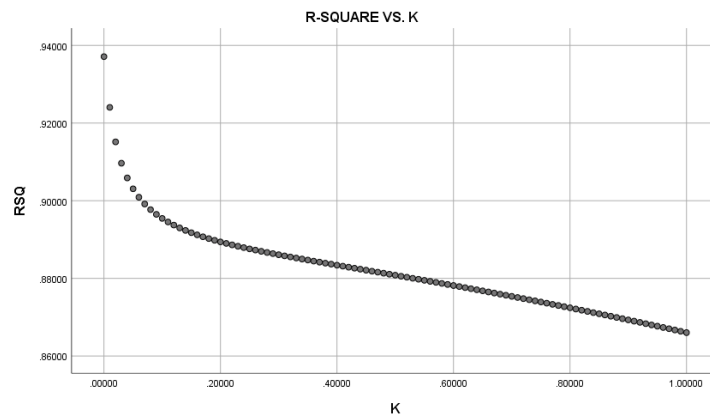

**Figure S4.** Relationship between the GHG ridge regression coefficient and K value and scatter diagram of determinable coefficient  $R^2$  and K value

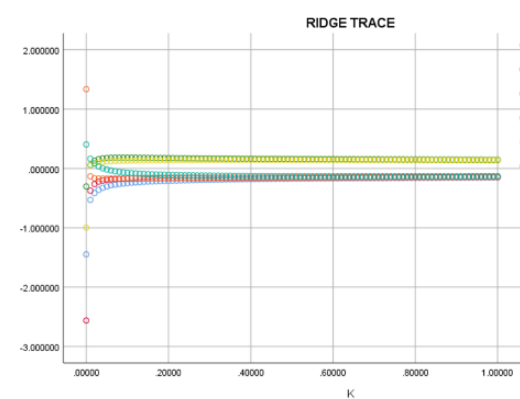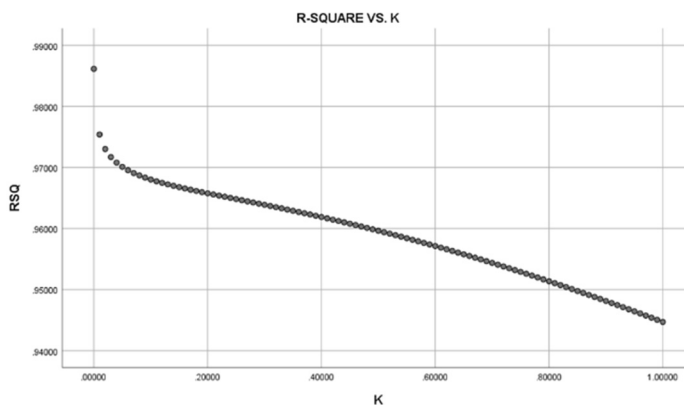

**Figure S5.** Relationship between the air pollutant ridge regression coefficient and K value and scatter diagram of determinable coefficient  $R^2$  and K value



## References

- Bai, L., Lu, X., Yin, S., Zhang, H., Ma, S., Wang, C., Li, Y., Zhang, R., 2020. A recent emission inventory of multiple air pollutant, PM<sub>2.5</sub> chemical species and its spatial-temporal characteristics in central China. *Journal of Cleaner Production* 269.
- Gao, R., Jiang, W., Gao, W., Sun, S., 2017. Emission inventory of crop residue open burning and its high-resolution spatial distribution in 2014 for Shandong province, China. *Atmospheric Pollution Research* 8, 545-554.
- Hasanbeigi, A., Lobscheid, A., Lu, H., Price, L., Dai, Y., 2013. Quantifying the co-benefits of energy-efficiency policies: a case study of the cement industry in Shandong Province, China. *Sci Total Environ* 458-460, 624-636.
- Hua, H., Jiang, S., Sheng, H., Zhang, Y., Liu, X., Zhang, L., Yuan, Z., Chen, T., 2019. A high spatial-temporal resolution emission inventory of multi-type air pollutants for Wuxi city. *Journal of Cleaner Production* 229, 278-288.
- Jiang, P., Chen, X., Li, Q., Mo, H., Li, L., 2020. High-resolution emission inventory of gaseous and particulate pollutants in Shandong Province, eastern China. *Journal of Cleaner Production* 259.
- Jiang, Q.Z., Ma, J.K., Chen, G.S., Li, Z.W., 2013. Estimation and analysis of carbon dioxide emissions in refineries. *Xiandai Huagong/Modern Chemical Industry* 33, 1-4+6.
- Liu, S., Hua, S., Wang, K., Qiu, P., Liu, H., Wu, B., Shao, P., Liu, X., Wu, Y., Xue, Y., Hao, Y., Tian, H., 2018. Spatial-temporal variation characteristics of air pollution in Henan of China: Localized emission inventory, WRF/Chem simulations and potential source contribution analysis. *Sci Total Environ* 624, 396-406.
- Qiu, P., Tian, H., Zhu, C., Liu, K., Gao, J., Zhou, J., 2014. An elaborate high resolution emission inventory of primary air pollutants for the Central Plain Urban Agglomeration of China. *Atmospheric Environment* 86, 93-101.
- Sun, S., Jiang, W., Gao, W., 2016. Vehicle emission trends and spatial distribution in Shandong province, China, from 2000 to 2014. *Atmospheric Environment* 147, 190-199.
- WANG Rui-peng, Z.Y., CHENG Shui-yuan, DUAN Wen-jiao, Lü Zhe, SHEN Ze-ya, 2020. The establishment of airports emission inventory and the air quality impacts for typical airports in North China. *CHINA ENVIRONMENTAL SCIENCE* 40, 1468-1476.
- Yi, X., Yin, S., Huang, L., Li, H., Wang, Y., Wang, Q., Chan, A., Traoré, D., Ooi, M.C.G., Chen, Y., Allen, D.T., Li, L., 2021. Anthropogenic emissions of atomic chlorine precursors in the Yangtze River Delta region, China. *Science of The Total Environment* 771, 144644.
- Zhang, B., Yin, S., Lu, X., Wang, S., Xu, Y., 2023. Development of city-scale air pollutants and greenhouse gases emission inventory and mitigation strategies assessment: A case in Zhengzhou, Central China. *Urban Climate* 48.
- Zhang, H., Hu, J., Qi, Y., Li, C., Chen, J., Wang, X., He, J., Wang, S., Hao, J., Zhang, L., Zhang, L., Zhang, Y., Li, R., Wang, S., Chai, F., 2017a. Emission characterization, environmental impact, and control measure of PM<sub>2.5</sub> emitted from agricultural crop residue burning in China. *Journal of Cleaner Production* 149, 629-635.

- Zhang, K., Yu, Z., Gao, H., Huang, T., Ma, J., Zhang, X., Wang, Y., 2017b. Gridded emission inventories and spatial distribution characteristics of anthropogenic atmospheric pollutants in Lanzhou valley. *Huanjing Kexue Xuebao/Acta Scientiae Circumstantiae* 37, 1227-1242.
- Zhong, Z., Zheng, J., Zhu, M., Huang, Z., Zhang, Z., Jia, G., Wang, X., Bian, Y., Wang, Y., Li, N., 2018. Recent developments of anthropogenic air pollutant emission inventories in Guangdong province, China. *Sci Total Environ* 627, 1080-1092.
- Zhou, M., Jiang, W., Gao, W., Gao, X., Ma, M., Ma, X., 2021. Anthropogenic emission inventory of multiple air pollutants and their spatiotemporal variations in 2017 for the Shandong Province, China. *Environ Pollut* 288, 117666.
- Zhou, Y., Xing, X., Lang, J., Chen, D., Cheng, S., Wei, L., Wei, X., Liu, C., 2017. A comprehensive biomass burning emission inventory with high spatial and temporal resolution in China. *Atmos. Chem. Phys.* 17, 2839-2864.
- Zhou, Z., Tan, Q., Deng, Y., Wu, K., Yang, X., Zhou, X., 2019. Emission inventory of anthropogenic air pollutant sources and characteristics of VOCs species in Sichuan Province, China. *Journal of Atmospheric Chemistry* 76, 21-58.
- Zhou, Z.H., Deng, Y., Tan, Q.W., Wu, K.Y., Yang, X.Y., Zhou, X.L., 2018. [Emission Inventory and Characteristics of Anthropogenic Air Pollutant Sources in the Sichuan Province]. *Huan Jing Ke Xue* 39, 5344-5358.
